# Supplementary material
Source: PubMed Central journal article supplement (PMC6440812)
Supplement: NIHMS1005481-supplement-1.pdf [file NIHMS1005481-supplement-1.pdf]

# **A common Chk1-dependent phenotype of DNA double-strand break suppression in two distinct radioresistant cancer types**

Patrick H. Dinkelborg<sup>1,2</sup>, Meng Wang<sup>1</sup>, Liliana Gheorghiu<sup>1</sup>, Joseph M. Gorski<sup>3</sup>, Theodore S. Hong<sup>1</sup>, Cyril H. Benes<sup>4</sup>, Dejan Juric<sup>3</sup>, Rachel B. Jimenez<sup>1</sup>, Kerstin Borgmann<sup>\*2</sup>, and Henning Willers<sup>\*1</sup>

<sup>1</sup>Department of Radiation Oncology, Massachusetts General Hospital, Harvard Medical School, Boston, Massachusetts;

<sup>2</sup>Laboratory of Radiobiology and Experimental Radiooncology, Clinic of Radiotherapy and Radiooncology, University Medical Center Hamburg-Eppendorf, Hamburg, Germany; <sup>3</sup>Department of Medicine, Massachusetts General Hospital Cancer Center, Harvard Medical School, Boston; <sup>4</sup>Center for Cancer Research, Massachusetts General Hospital, Harvard Medical School, Charlestown, Massachusetts

\* co-senior authors

## **ELECTRONIC SUPPLEMENTAL MATERIAL**

### **Figures S1-5**

## Supplementary Figure Legends

### Suppl. Fig. S1.

A) Panel of breast cancer cell lines used in the current study.

B) Chk1 inhibitor LY2603618 blocks autophosphorylation of Chk1 kinase while at the same time enhancing DNA damage-mediated phosphorylation of serine 345 (Wang et al., Apoptosis 2014 Sep;19(9):1389-98).

### Suppl. Fig. S2.

A) Short-term radiosensitization factors (6 Gy) for breast cancer cell lines grown as mammospheres.

B) Fraction of cells as measured by CellTiterGlo (Promega) following 5 days of treatment with Chk1 inhibitor LY2603618 at concentrations indicated.

### Suppl. Fig. S3.

Fraction of cells with 5+ RAD51 foci, corrected for baseline foci in untreated cells, 24 hours following incubation of cells with 0.25 mg/ml doxorubicin.

### Suppl. Fig. S4.

A) Western blot for total Aurora B protein in triple-negative MDA-MB-468 cells. Cells were exposed to 1 hour treatment with small molecule inhibitors against Chk1 (LY2603618), EGFR (erlotinib), and Aurora B (AZD1152). Cells were arrested at the G1/S border using a double thymidine (TdR) block as previously described (Wang et al., Cancer Res 2014, 74(10):2825-2834).

B) Representative FACS images for MDA-MB-468 cells treated with Aurora B inhibitor (AurBi) AZD1152 for 1 hour +/- 1 Gy irradiation followed by standard flow cytometry 30 minutes later as described (Wang et al., Cancer Res 2014, 74(10):2825-2834).

### Suppl. Fig. S5.

Expression of *EGFR*, *AURKB*, and *CHEK1* in TNBC vs receptor-positive cell lines using the CCLE (Rhodes et al., Neoplasia 2004, 6(1):1-6).

# Supplementary Figure S1

A

| Cell line  | ER  | PR  | HER2 | TP53 | Histology | Subtype |
|------------|-----|-----|------|------|-----------|---------|
| BT-474     | +   | [+] | +    | wt   | IDC       | LU      |
| EFM-19     | +   | +   |      | fs   | Ac        | LU      |
| MCF-7      | +   | [+] |      | wt   | IDC       | LU      |
| MDA-MB-361 | +   | [-] | +    | wt   | AC        | LU      |
| T47-D      | +   | [+] |      | 194  | IDC       | LU      |
| BT-20      | -   | [-] |      | 132  | IDC       | BaA     |
| BT-549     | -   | [-] |      | 249  | IDC,pap   | BaB     |
| MDA-MB-157 | -   | [-] |      | del  | Mc        | BaB     |
| MDA-MB-231 | -   | [-] |      | 280  | AC        | BaB     |
| MDA-MB-436 | [-] | [-] |      | fs   | IDC       | BaB     |
| MDA-MB-468 | [-] | [-] |      | 273  | AC        | BaA     |

ER, estrogen receptor; PR, progesterone receptor; wt, wild-type; fs, frameshift mutation; del, deletion; IDC, invasive ductal carcinoma; AC, adenocarcinoma; Pap, papillary carcinoma; MC, mucinous carcinoma; LU, luminal; Ba, basal A or B

B

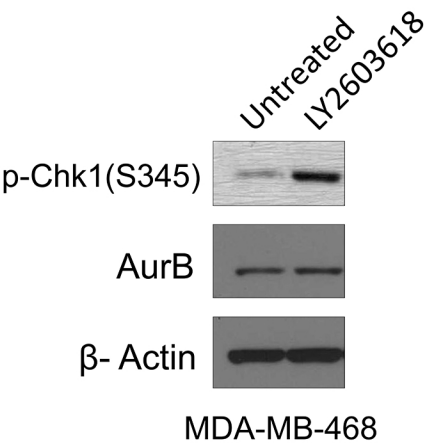

# Supplementary Figure S2

A

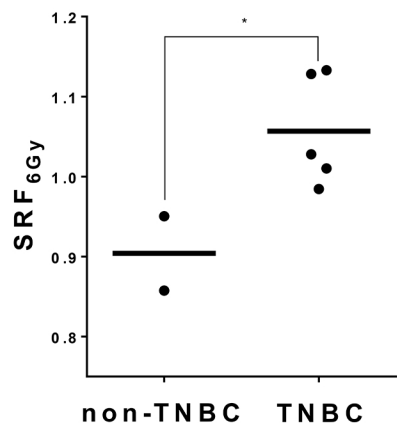

B

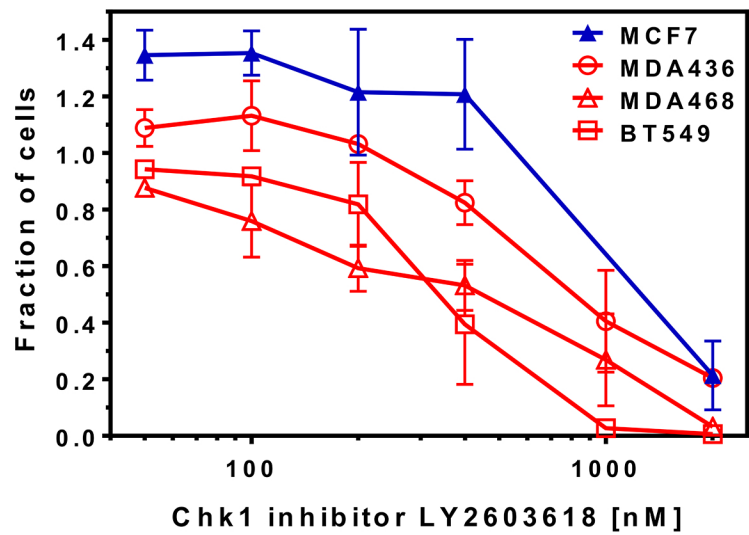

Supplementary Figure S3

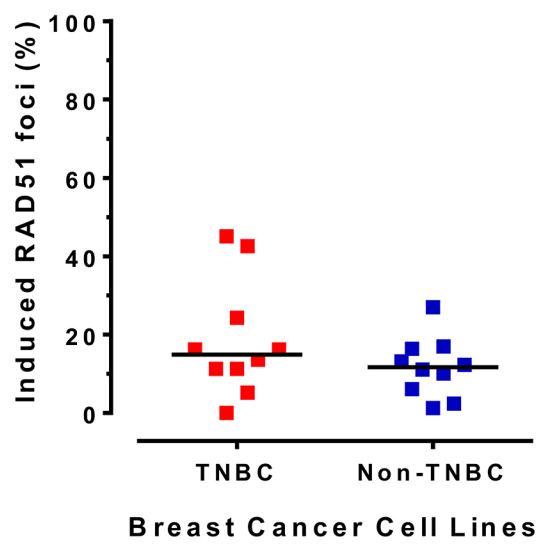

# Supplementary Figure S4

A

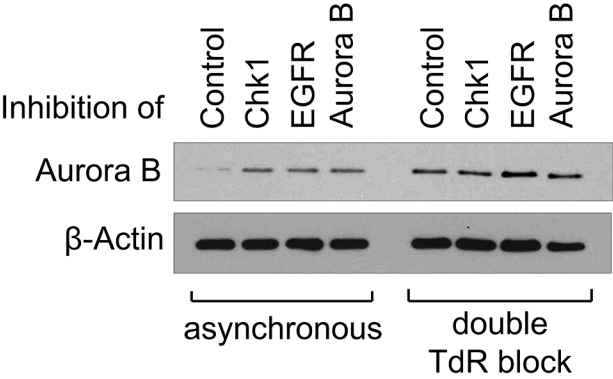

B

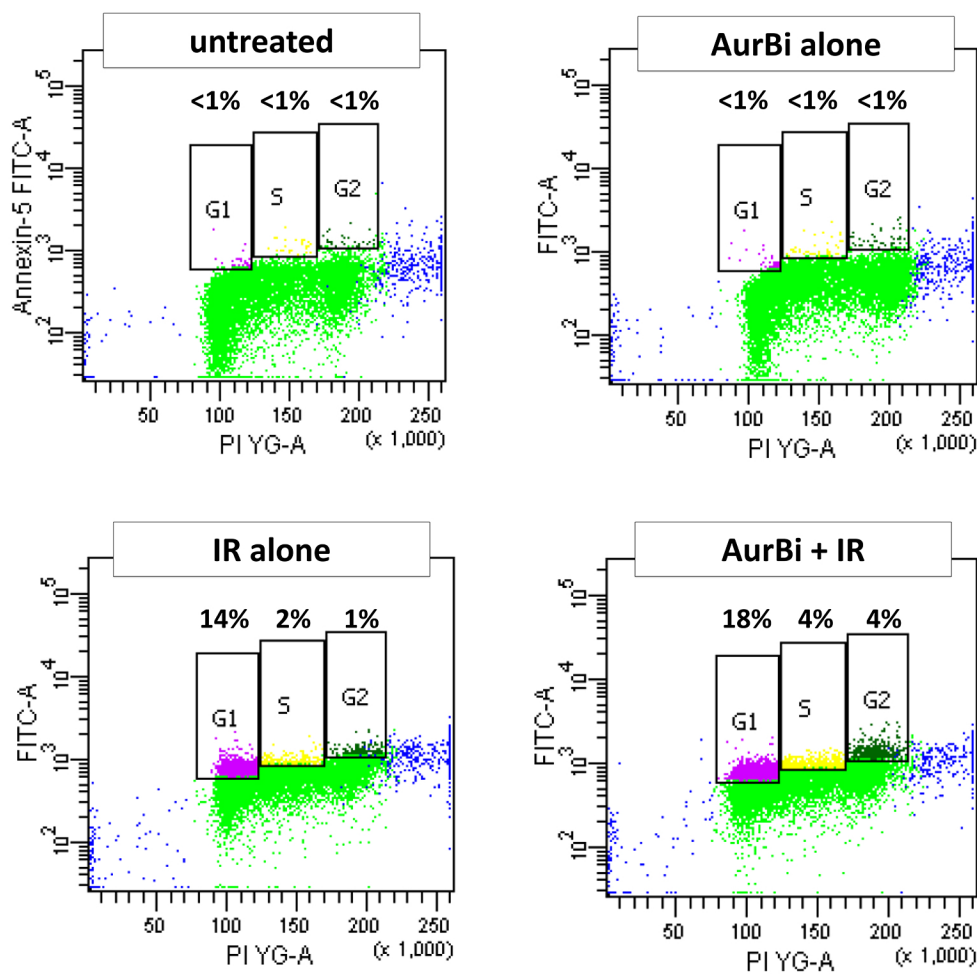

## Supplementary Figure S5

| Rank | P-value | Fold Change | Gene  |      |  |  |  |  |  |  |  |  |  |  |  |  |  |  |  |                   |  |  |  |  |  |  |  |  |  |  |  |  |  |  |  | Reporter    |
|------|---------|-------------|-------|------|--|--|--|--|--|--|--|--|--|--|--|--|--|--|--|-------------------|--|--|--|--|--|--|--|--|--|--|--|--|--|--|--|-------------|
| 89   | 1.51E-5 | 4.81        | EGFR  |      |  |  |  |  |  |  |  |  |  |  |  |  |  |  |  |                   |  |  |  |  |  |  |  |  |  |  |  |  |  |  |  | 201983_s_at |
| 244  | 1.65E-4 | 1.73        | AURKB |      |  |  |  |  |  |  |  |  |  |  |  |  |  |  |  |                   |  |  |  |  |  |  |  |  |  |  |  |  |  |  |  | 209464_at   |
| 555  | 0.001   | 1.53        | CHEK1 |      |  |  |  |  |  |  |  |  |  |  |  |  |  |  |  |                   |  |  |  |  |  |  |  |  |  |  |  |  |  |  |  | 205393_s_at |
|      |         |             |       | TNBC |  |  |  |  |  |  |  |  |  |  |  |  |  |  |  | Receptor positive |  |  |  |  |  |  |  |  |  |  |  |  |  |  |  |             |
